## **SGK1.1 activation causes early seizure termination via effects on M-current**

Natalia Armas-Capote<sup>1#</sup>, Laura E. Maglio<sup>1#</sup>, Leonel Pérez-Atencio<sup>2</sup>, Elva Martín-Batista<sup>1</sup>, Antonio Reboreda<sup>4</sup>, Juan A. Barios<sup>3</sup>, Guadalberto Hernández<sup>1</sup>, Diego Álvarez de la Rosa<sup>1</sup>, José Antonio Lamas<sup>4</sup>, Luis C. Barrio<sup>2</sup>, Teresa Giraldez<sup>1\*</sup>

*<sup>1</sup>Departamento de Ciencias Médicas Básicas-Fisiología and Instituto de Tecnologías Biomédicas (ITB), Universidad de La Laguna, Tenerife, Spain; <sup>2</sup>Unidad de Neurología Experimental, Hospital Ramon y Cajal-IRYCIS, Madrid, Spain; <sup>3</sup>Systems Engineering and Automation Department, Miguel Hernández University, Elche, Spain; <sup>4</sup>Department of Functional Biology and Health Sciences, Faculty of Biology - CINBIO-IBIV, University of Vigo, Vigo, Spain*

#Both authors contributed equally

\*To whom correspondence should be addressed:

Dr. Teresa Giraldez

Departamento de Ciencias Médicas Básicas - Fisiología

Campus de Ciencias de la Salud s/n

Universidad de La Laguna

38071 La Laguna, Tenerife, Spain

Telephone: +34-922-319-356

E-mail: [giraldez@ull.edu.es](mailto:giraldez@ull.edu.es)

**Conflict of interest statement:** The authors have declared that no conflict of interest exists

## Abstract

Early termination of *status epilepticus* affords protection against brain damage and associated pathologies. Regulation of Kv7.2/7.3 potassium channels, underlying the neuronal M-current, is key for seizure control. This conductance is maintained during initiation of action potentials, affecting neuronal excitability and thus inhibiting epileptic discharges. The M-current is upregulated by the neuronal isoform of the serum and glucocorticoid-regulated kinase SGK1 (SGK1.1). We tested whether SGK1.1 is an anticonvulsant factor using the kainic acid (KA) model of acute seizures in a transgenic mouse model with expression of a constitutively active form of the kinase. Our results demonstrate that SGK1.1 confers robust protection against seizures associated to lower mortality levels, independently of sex or genetic background. SGK1.1-dependent protection results in reduced number, shorter duration, and early termination of EEG seizures. At the cellular level, it is associated to increased M-current amplitude mediated by Nedd4-2 phosphorylation, leading to decreased excitability of hippocampal CA1 neurons without alteration of basal synaptic transmission. Altogether, our results reveal that SGK1.1-mediated M-current upregulation in the hippocampus is a key component of seizure resistance in the KA epileptic paradigm, suggesting that regulation of this anticonvulsant pathway may improve adverse outcomes to *status epilepticus*, constituting a potential target for antiepileptic drugs.

## Introduction

*Status epilepticus* (SE) is a life-threatening emergency characterized by a state of continuous behavioral or electroencephalographic (EEG) seizures lasting more than 5 min, or discrete seizures that occur without conscious recovery between them (1, 2). SE is considered one of the initial insults by which a normal brain becomes epileptic, with spontaneous recurrent seizures leading to the development of different types of epileptic conditions (3). Temporal Lobe Epilepsy (TLE) is one of the most common forms of epilepsy and the most refractory to treatment in humans. It originates in restricted limbic structures (temporal lobe: hippocampus, parahippocampal areas and amygdala) and often involves secondary generalized seizures. The outcomes of this challenge depend on prompt seizure termination that will secure brain protection against permanent neuronal damage and associated pathologies (4). If seizures are controlled, SE occurs with no apparent consequences; however, epidemiologic studies show that 43% of patients with SE develop epilepsy (5). Moreover, 30-50% of patients with SE are refractory to pharmacological treatments (6). In this case, SE can potentially result in epileptic syndromes, long-term neurological dysfunction or even death, especially when seizure duration is longer than one hour (7).

In neurons, Kv7.2 and Kv7.3 (KNCQ2 and KCNQ3 genes) form heterotetrameric channels that constitute the molecular basis of the neuronal M-current, named after its well-known inhibition via muscarinic receptor activation, which underlies some cholinergic excitatory pathways (8, 9). Kv7.2/7.3 activation counteracts brain excitability since they are active at subthreshold potentials near to -60 mV, and do not inactivate under persistent depolarization (10). This leads to a membrane potential stabilization under subthreshold excitatory inputs, preventing repetitive action potential firing (9). Thus, Kv7.2/7.3 channels constitute a potent inhibitory mechanism that is especially relevant in hyperexcitability disorders such as epilepsy. We previously described a novel physiological mechanism of M-current regulation via activation of SGK1.1, the neuronal isoform of the serum and glucocorticoid-regulated kinase 1 (SGK1) (11). This isoform arises from alternative splicing of the *Sgkl* gene (12). The ubiquitous and neuronal isoforms share the catalytic and activation domains but differ in their N-terminal domain. SGK1.1 shows enhanced stability and is

tethered to the plasma membrane by binding to phosphatidylinositol 4,5-bisphosphate (PIP<sub>2</sub>) (12, 13), a primary controller of M-current activity (14). The SGK1.1 regulatory pathway provides a potential confluent point between muscarinic-dependent inhibition of Kv7.2/7.3 channels and their SGK1.1-mediated upregulation (11).

Our laboratory developed a transgenic mouse model (B6.Tg.sgk1) with increased SGK1 activity, in which preliminary experiments hinted that SGK1.1 confers resistance to kainic acid (KA)-induced seizures by upregulating the M-current in the brain (11). We now demonstrate that SGK1.1 activity confers resistance to KA-seizures, potently decreasing seizure severity. Electroencephalographic analysis revealed that SGK1.1 associates with early termination of seizure events, which in addition occur at significantly lower number and shorter durations. These effects depend on upregulation of the M-current via Nedd4-2 phosphorylation, leading to reduced hippocampal neuronal excitability without affecting basal synaptic transmission. Taken together, these results support a relevant role of SGK1.1 in regulating neuronal excitability as an anticonvulsant factor that may improve deleterious outcomes of SE.

## Results

### ***B6.Tg.sgk1 mice show reduced seizure severity and no lethality during acute KA-induced SE***

Seizure responses in 4-5 month-old B6.WT and B6.Tg.sgk1 mice were evaluated using a modified Racine scale (see Methods and (11)). After a single intraperitoneal dose of KA (20 mg/kg), all mice in both groups reached early Racine stages 1-3, which are dominated by low severity, non-convulsive manifestations. However, progression to stage 4, a more severe and convulsive stage, was significantly reduced in B6.Tg.sgk1 mice when compared to B6.WT. This difference was more pronounced when comparing the percentage of B6.WT and transgenic mice showing tonic-clonic seizures (60% vs. 17% reaching stage 6, respectively; **Figure 1A**). Around 20% of B6.WT mice reached stage 7 (death), consistently with previous reports (15). Strikingly, B6.Tg.sgk1 mice did not display lethality events (**Figure 1A**).

Evaluation of the time course of KA-induced seizure behavior by scoring Racine stage averages in 5 min intervals throughout the experiment (16) revealed an acute progression towards higher Racine scale stages during the first 30 min after KA administration in both genotypes (**Figure 1B**). However, after this initial period B6.WT mice progressively reached more severe seizure behavior stages, while transgenic mice stabilized and subsequently showed a reversion pattern (**Figure 1B**). We integrated the individual scores per mouse for the total duration of the experiments to better account for seizure severity in mice that died during the experiment, as described previously (16). As shown in **Figure 1C**, seizure severity was significantly reduced in B6.Tg.sgk1 mice. Importantly, the protective effect of SGK1.1 activation against seizures was independent of sex and genetic background, which have been shown to affect seizure susceptibility in various animal paradigms (15, 17-22) (**Supplemental Figure 1**).

Altogether, our results demonstrate that SGK1.1 activation in transgenic mice confers less susceptibility to KA-induced behavioral seizures and reduced mortality. Additionally, they suggest that the transgene affects the time course of SE evolution.

### ***Reduced KA-induced seizure severity in B6.Tg.sgk1 mice depends on M-current activation***

Previous work from our group showed enhanced M-current activity paralleled with decreased excitability and more negative resting potentials in isolated superior cervical ganglion (SCG) sympathetic neurons from B6.Tg.sgk1 mice (11). This observation, together with the well described role of this K<sup>+</sup> current in controlling neuronal excitability, led us to hypothesize that upregulation of the M-current in the central nervous system (CNS) is the mechanism underlying resistance to KA-induced seizures and reduced mortality after *Sgk1* activation. The protective effect of *Sgk1* activation was abolished in transgenic mice that had been previously treated with a specific M-current inhibitor, XE991. This was evident in the percentage of mice showing tonic-clonic seizures (**Figure 1A**, *red open triangles*) and the time-course of seizure behavior (**Figure 1B**, *red open triangles*). Accordingly, no differences in seizure severity were observed in WT vs. transgenic mice after XE991 treatment (**Figure 1C**, *red bars*).

The observed effects on seizure behavior and M-current regulation could be attributed, at least partially, to alterations in the gene expression of KA receptors (GluK1-5; GRIK1-GRIK5 genes) or Kv7.2/3 channels, due to unknown effects of the constitutively active *Sgk1* in the B6.Tg.sgk1 transgenic mice. However, this seems not to be the case, since quantitative PCR (qPCR) experiments revealed no significant alterations in KCNQ2, KCNQ3 or GRIK1-5 mRNA expression in the hippocampus (**Supplemental Figure 2**).

Altogether, these data strongly suggest that upregulation of M-current function constitutes the mechanism underlying protection against convulsions driven by *Sgk1* activation.

#### ***CA1 pyramidal neurons from B6.Tg.sgk1 showed increased M-current amplitude***

The effect of SGK1.1 in relevant CNS epileptogenic areas, including hippocampus (23), remain unknown. We performed whole-cell patch-clamp recordings in CA1 pyramidal neurons (CA1-PN) from B6.Tg.sgk1 and B6.WT mice hippocampal slices. B6.Tg.sgk1 CA1-PN showed significantly higher levels of M-current, measured as the XE991-sensitive current (**Figure 1D**). Importantly, this difference was abolished after addition of the SGK1 inhibitor EMD638683 (**Figure 1D**, *right panel*). These results support the idea that SGK1.1-mediated upregulation of the M-current in CA1-PN underlies the seizure-resistant phenotype observed in Tg.sgk1 mice.

To date, *in vivo* phosphorylation targets of SGK1.1 isoform remain unknown. In heterologous expression systems, activation of *Sgk1* modulates M-current amplitude by increasing Kv7.2/7.3 channels cell surface expression through a mechanism involving the ubiquitin ligase Nedd4-2 (11, 24, 25). We observed a significant increase in phosphorylation levels of Nedd4-2 in HEK293 cells transiently co-transfected with SGK1.1 and Nedd4-2 (**Supplemental Figure 3A**). Additionally, phosphorylation of endogenously-expressed GSK3 $\beta$ , another known target of SGK1 (26), was increased when SGK1.1 was transiently transfected in HeLa cells (**Supplemental Figure 3B**), suggesting that SGK1 isoforms share phosphorylation targets. Importantly, in B6.Tg.sgk1 hippocampal tissue we observed higher phosphorylation of Nedd4-2, which was prevented after incubation with the SGK1 inhibitor EMD638683 (**Figure 1E-F**). Our data demonstrate that Nedd4-2 is a substrate of SGK1.1 in hippocampal neurons, constituting a regulatory pathway underlying M-current modulation by this kinase in hippocampus.

#### ***Epileptic EEG activity during KA-induced SE is reduced in B6.Tg.sgk1 mice***

Video recordings coupled to EEG allowed us to investigate the neurophysiological basis underlying the different time course of behavioral Racine stages between transgenic and WT mice. **Figure 2** shows representative recordings of hippocampal and cortex EEG activity in B6.Tg.sgk1 and B6.WT adult male mice, 1 h before and up to 6 h after a single dose of KA. Evolution of epileptic activity was quantitatively evaluated using time–frequency analysis and the normalized amplitude of hippocampal and cortex signals. In B6.WT mice, KA administration induced a continuous epileptic pattern of SE that resulted in repetitive electrical spiking (spikes, and spike-and-wave complexes) alternating with recurrent episodes of high frequency spike discharge (**Figure 2A**). As the seizure severity progressed from stage 1 to the first generalized seizure (GS; stages 4-5), the EEG signals enlarged in amplitude and a visible increase in the power of multiple frequencies emerged (marked as **(1)** in **Figure 2A**). This first GS led to a profound postictal depression before the next GS reinitiated. SE progressively worsened over the course of 1-2 h due to the acceleration of GS rate and enhancement of the interictal spiking activity (marked as **(2)** in **Figure 2A and 2Ci**). During

the following 2-6 h of recordings, the severity of SE declined. GS rate decreased progressively, while an intensive spiking activity still remained (marked as **(3)** in **Figure 2A and 2Ci**). Note that epileptic activity in cortex increased significantly less than in hippocampus. Interestingly, some episodes of hippocampal GS did not transfer to cortex, in accordance to the observation that epileptic EEG activity in KA model initiates in the limbic system before it spreads to neocortex (23, 27). In comparison, B6.Tg.sgk1 mice showed significantly lower SE severity; although SE progressed initially in a similar manner (0-30 min), a more rapid and profound reduction in the number of GS and spiking activity occurred over time. Seizures subsided and the EEG returned to normal activity within 6 h of recording (**Figure 2B and 2Cii**).

***Increased SGK1.1 activity reduces the number and duration of generalized seizures without affecting its onset activity in hippocampus and cortex***

The impact of *Sgk1* on GS number quantified from EEG recordings was significantly reduced in hippocampus and cortex of B6.Tg.sgk1 mice (**Figure 3A**). Both B6.WT and B6.Tg.sgk1 mice underwent a similar increase of GS number during the first hour, after which transgenic mice reverted towards a lower number of GS that practically disappeared within 3 hours. In contrast, B6.WT mice maintained significantly elevated GS numbers during at least 4 hours after the KA challenge (**Figure 3A**).

In addition to the number of GS, seizure duration is a key factor affecting the recovery from acute SE that has been highlighted as a determinant for brain damage and mortality (7). Analysis of seizure duration over the time course of the EEG experiments revealed significantly lower values in B6.Tg.sgk1 than in B6.WT mice, both in hippocampus and cortex (**Figure 3B**). Interestingly, this reduction in GS duration appeared earlier than the observed difference in GS number. Conversely, we observed a significant increase in the inter-seizure period for B6.Tg.sgk1 mice within 2-4 hours after KA administration (**Figure 3C**), indicating a faster time course for seizure termination. Seizure severity induced by systemic KA administration, calculated as cumulative seizure time was significantly reduced in B6.Tg.sgk1 mice (**Supplemental Figure 4**). This result is consistent with



the observed lower lethality levels (**Figure 1**) and diminished brain damage (unpublished observations) in transgenic mice. In summary, our results demonstrate that the SGK1.1 anticonvulsant effect involves reduction of both the number and the duration of epileptic events, as well as an earlier termination of seizure activity.

***Basal synaptic transmission is not modified by increased SGK1.1 activity***

EEG results prompted us to study the effect of *Sgkl* activation on neuronal excitability in hippocampus. First, we characterized basal synaptic transmission by recording miniature excitatory or inhibitory postsynaptic currents (mEPSC and mIPSC) from hippocampal CA1-PN. Increased SGK1.1 activity in B6.Tg.sgkl mice had no effect on the frequency of mEPSC (**Figure 4A-B**) and mIPSC (**Figure 4E-F**), suggesting that *Sgkl* activation does not modulate the probability of glutamate or GABA release at the synapse. Additionally, no differences were observed on the amplitude of mEPSC (**Figure 4C-D**) nor mIPSC (**Figure 4G-H**) recorded from B6.Tg.sgkl vs. B6.WT. This result suggests that *Sgkl* activation has no significant effect on the functional levels of AMPA/NMDA (mEPSC) nor GABA<sub>A</sub> (mIPSC) postsynaptic receptors. Therefore, we conclude that basal synaptic transmission is unaltered by SGK1.1 activation.

***B6.Tg.sgkl CA1 pyramidal neurons show reduced excitability***

In SCG neurons, the M-current regulates resting membrane potential and some relevant features of neuronal function (10, 28). We assessed the influence of *Sgkl* activation on hippocampal CA1-PN intrinsic membrane properties and action potential characteristics by performing whole-cell current-clamp recordings in tissue slices. Interestingly, we found no significant differences between genotypes (**Supplemental Figure 5**), indicating that passive and active properties of CA1-PN are unaffected by the expression of the transgene.

The M-current is considered a key component in regulatory mechanisms of excitability by controlling spiking frequency, among other mechanisms (9, 29, 30). Therefore, we determined whether CA1-PN from B6.Tg.sgkl mice show altered excitability, defined as the overall tendency to generate evoked action potentials in response to increasing current injection steps. To that end, we studied the action potential frequency-current relationship using depolarizing current steps from

100 pA to 350 pA in 50 pA increments. Interestingly, our results showed a significant reduction of firing frequency in B6.Tg.sgk1 CA1-PN when compared to B6.WT (**Figure 5A-B**), indicating reduced excitability in transgenic neurons. We next evaluated KA-induced alterations in membrane properties and excitability in hippocampal CA1-PN. Application of KA induced a significantly smaller increase in neuronal firing frequency in B6.Tg.sgk1 than in B6.WT mice (**Figure 5B**). Addition of KA progressively led resting membrane potential towards more depolarized values (**Figure 5C**). This difference reached maximum values 5 min after KA application, in agreement with previous reports (31). Most importantly, the change in membrane potential was significantly smaller in B6.Tg.sgk1 compared to B6.WT neurons (**Figure 5C**), suggesting that constitutively active SGK1.1 induces a resistance to depolarization induced by KA hippocampal CA1 neurons.

Spike frequency adaptation (SFA) is an intrinsic neuronal property that depends on the specific battery of ion channels expressed at the membrane of the different neuronal types. SFA is characterized by a progressive increment in the interspike intervals (ISIs) (32). It has been demonstrated that M-current activation during neuronal firing regulates ISIs, leading to increased SFA in many neuronal types, including CA1-PN (33-35). We quantified CA1-PN ISIs over time by applying depolarizing 1-s pulses from 100 pA to 350 pA (**Figure 5D-I**). At the beginning of the depolarizing pulse, ISIs were similar for both genotypes. Interestingly, at 100 to 350 pA current injection pulses ISI plateau was significantly higher in transgenic neurons (e.g., ISI plateau at 200 pA current injection was  $42.0 \pm 0.8$  ms in B6.Tg.sgk1 vs.  $34.8 \pm 0.5$  in B6.WT; tau:  $127.0 \pm 10.3$  ms in B6.Tg.sgk1 vs.  $104.6 \pm 7.1$  in B6.WT;  $p < 0.001$ ; **Figure 5F**). These results suggest that activation of SGK1.1 controls SFA by regulating ISIs.

## Discussion

In this study, we have shown that transgenic expression of the *Sgk1* gene including a mutation for constitutive activation confers remarkable protection against seizures in the KA model. In neurons, *Sgk1* function mainly results in expression of the SGK1.1 isoform (12), which regulates membrane abundance of Kv7.2/7.3 tetramers underlying the M-current (11). The protection against KA-induced seizures was lost when animals were treated with the specific M-current inhibitor XE991,

which also abolished the decrease in membrane excitability in transgenic CA1-PN. Altogether, these results demonstrate that the upregulation of M-current is the main mechanism underlying the effect of SGK1.1. The protection effect of *Sgk1* is robust, with little variation due to factors such as sex or genetic background, which commonly act as modifiers in the phenotypic effects of genetic manipulation. EEG recordings demonstrated that seizure protection in transgenic mice arises mainly from reduced number of GS, which additionally showed shorter duration, together with early SE termination.

Behavior analysis of KA-induced seizures showed clear differences in the temporal development of seizure patterns, indicating a possible effect on seizure progression. EEG recordings from KA-injected animals clearly showed that the onset of seizures is not altered. Strikingly, transgenic mice showed a significantly reduced number and shorter duration of seizure events in hippocampus and cortex, together with earlier termination of seizures. There are several mechanisms that could explain these observations. First, our results raise the question of whether transgenic mice present reduced KA bioavailability. Our finding that B6.WT and B6.Tg.sgk1 mice show comparable seizure latency values rules out the possibility that KA reaches the brain at lower concentration. Second, differential response to KA between genotypes could be due to variability in the amount or activity of GluK receptors. However, we observed no changes in mRNA expression of GRIK1-5 mRNA in hippocampus. Interestingly, there was a small but significant increase in GRIK1 and GRIK2 expression in the cortex of transgenic animals. Therefore, we cannot discard that some variations in GluK abundance may affect the phenotype, although the observed difference would go against the effect of the transgene rather than explaining it. All the same, it should be noted that the function of GluK from brain structures other than hippocampus is likely to be of no relevance in seizure initiation and propagation in the KA-model (23, 27, 36). Third, differences in the response to KA could be attributable to basal alterations in synaptic transmission (e.g., an increase or decrease in glutamatergic or GABAergic transmission) due to *Sgk1* activation. However, we demonstrate that both basal excitatory and inhibitory synaptic transmission are not different between both genotypes. Finally, a reduced effect of KA would be expected if transgenic animals

showed intrinsically lower neuronal excitability. In light of our previous results obtained with M-current measurements in isolated SCG neurons from B6.Tg.sgk1 (11), it was reasonable to hypothesize that reduced excitability due to increased M-current magnitude plays a major role in resistance to KA-induced seizures. In fact, our results demonstrate a reduction in the intrinsic excitability of CA1-PN from B6.Tg.sgk1, as reflected by a decrease in the firing frequency and the increase in the SFA compared to B6.WT neurons under the same stimulation conditions. These results are reminiscent of the effects of retigabine, a Kv7.2/Kv7.3 channel opener that shortens number and duration of EEG spike bursts on KA-treated mice (37). This conclusion is reinforced by the effects of XE991 shown in this study, which revert the effect of KA injection in B6.Tg.sgk1 mice towards the B6.WT phenotype.

In hippocampal CA1-PN, *Sgk1* activation resulted in reduced SFA. This effect was not accompanied by changes in basal synaptic transmission properties, intrinsic membrane properties or action potential characteristics. These results can be explained based on the fairly negative resting membrane potentials observed in hippocampal neurons, which are unlikely to be under the control of the M-current (that is activated between -60 mV and -20 mV, approximately). In these neurons, the role of the M-current will be made evident when the cell is depolarized (e.g., after KA administration) or actively firing (therefore the observed effect on SFA (32, 33)).

One of the most remarkable results obtained in this study is the role of SGK1.1 on controlling the number and duration of epileptic events, playing an important role in limiting the progression of SE in the KA model. This is especially relevant not only to antagonize convulsive activity but also because early seizure termination has been connected to protection against permanent neuronal damage and associated pathologies (7, 38, 39). Moreover, it could explain the striking differences found in lethality rates between KA-treated transgenic and WT animals, particularly in adult male B6.Tg.sgk1, where there was no death. This is in accordance with high mortality rates associated to SE when seizure duration is longer than 1 h (7).

Drugs effective against KA-induced seizures have been proposed to be relevant for temporal lobe epilepsy (TLE) (23, 40). The potent anticonvulsant role of SGK1.1 against KA-induced seizures

suggests that activation of SGK1.1 could be useful in seizure control during SE, which could in turn limit TLE progression. This indicates that SGK1.1 may mediate antiepileptogenic effects in pathways with key roles in the development of TLE. Further study in the context of a chronic model of epilepsy such as pilocarpine treatment (41) will be necessary to demonstrate long-term effects on limiting TLE development.

In summary, our work demonstrates that introduction of a modified BAC harboring the full-length *Sgk1* gene with an activating point mutation mediates protection against KA-induced SE by limiting seizure progression. This effect depends on hippocampal M-current upregulation, which results in reduced KA-induced depolarization and reduced neuronal excitability.

## Material & Methods

### *Animals*

All experimental procedures were approved by the University of La Laguna, the University of Vigo, and the Hospital Ramón y Cajal Ethics Committees on Animal Welfare and conform to Spanish and European guidelines for the protection of experimental animals (RD1201/2005; 2010/63/EU). The B6.Tg.sgk1 mouse line was generated by pronuclear injection of (C57BL/6J x SJL/J) F2 embryos with a bacterial artificial chromosome (BAC) containing the whole SGK1/SGK1.1 gene and a point mutation (S515D) that renders the kinase constitutively active (11). FVB.Tg.sgk1 mice were generated by transferring the transgene to the inbred strain FVB/N, backcrossing for 9 generations. Wild type mice (B6.WT or FVB.WT) in the same genetic background (C57BL6/6J or FVB/N, respectively) were used as control.

### *Kainic acid administration and evaluation of seizure behavior*

SE was induced by intraperitoneal injection of 20 mg/kg KA, as described previously (11). Where indicated, intraperitoneal injection of 10 mg/kg XE991 was performed 1 h prior to KA injection (42). Seizure behavior was scored by two independent experimenters blinded to the genotypes, using a modified Racine scale (43): immobility (*stage 1*); forelimb and/or tail extension (*stage 2*); repetitive movements, head bobbing (*stage 3*); rearing and falling (*stage 4*); continuous rearing and falling, jumping and/or wild running (*stage 5*); generalized tonic-clonic seizures (*stage 6*); death (*stage 7*). Seizure severity was determined as previously described (16):

$$\text{Seizure Severity} = \sum (\text{all scores of a given mouse}) / \text{time of experiment}$$

The severity of all genotypes or conditions tested was normalized to WT mice (16).

### *Brain slice preparation*

Anesthetized 4-6 week old male mice (ketamine:xylazine cocktail, 60:5 mg/kg) were intracardially perfused with ice-cold choline-based artificial cerebrospinal fluid (ACSF-Ch), containing (in mM): 110 choline chloride, 1.25 NaH<sub>2</sub>PO<sub>4</sub>, 25 NaHCO<sub>3</sub>, 7 MgCl<sub>2</sub>, 0.5 CaCl<sub>2</sub>, 2.5 KCL, 7 glucose, 3 pyruvic acid, and 1.3 ascorbic acid. Coronal hippocampal slices (350 μM thick), obtained using a

VT1000S vibratome (Leica), were equilibrated in ACSF (in mM: 125 NaCl, 1.25 NaH<sub>2</sub>PO<sub>4</sub>, 25 NaHCO<sub>3</sub>, 2 MgCl<sub>2</sub>, 1.6 CaCl<sub>2</sub>, 2.5 KCl, and 10 glucose; pH = 7.35) constantly bubbled with carbogen (95% O<sub>2</sub>, 5% CO<sub>2</sub>), for ≥ 1h before recordings.

### ***Whole-cell patch-clamp recordings***

Hippocampal CA1-PNs were recorded using the whole-cell current-clamp and voltage-clamp configurations of the patch-clamp technique using an Axopatch amplifier and pCLAMP software (Molecular Devices). Slices were visualized with an upright microscope (Zeiss Axoskop 2FS or Olympus BX51WI) and a near-infrared charged-coupled device camera. Recordings were performed at 34±1.5°C in a submerged recording chamber continuously perfused with ACSF. 0.5µM tetrodotoxin (TTX; Sigma) was added in voltage-clamp experiments. Patch pipettes (5-8 MΩ) were pulled from borosilicate glass capillaries (Science Products) using a P-87 horizontal puller (Sutter Instruments). Pipettes were filled with an intracellular solution containing (in mM): 120 K-gluconate, 10 HEPES, 0.2 EGTA, 20 KCl, 2MgCl<sub>2</sub>, 7 di-Tris-phosphocreatine, 4 Na<sub>2</sub>ATP, 0.3 Tris-GTP, and 0.1% biocytin (pH adjusted at 7.3 with KOH). Sampling rate was 20 kHz with low-pass filtering at 5 kHz.

### ***Miniature postsynaptic current recordings***

Hippocampal CA1-PNs were recorded using the whole-cell voltage-clamp configuration of the patch-clamp technique. Miniature inhibitory postsynaptic currents (mIPSC) were recorded at -70 mV in ACSF in the presence of 1 µM TTX, 20 µM 7-nitro-2,3-dioxo-1,4-dihydroquinoxaline-6-carbonitrile (CNQX; Tocris), and 50 µM D-2-amino-5-phosphonovaleric acid (D-AP-5; Tocris) to isolate synaptic inhibitory transmission. Recording pipettes were filled with an internal solution containing (in mM): 113 K<sup>+</sup>-gluconate, 25 KCl, 10 HEPES, 0.2 EGTA, 4 Na<sub>2</sub>ATP, and 0.3 Na<sub>2</sub>GTP (pH 7.3, 320-340 mOsm). With these external and internal solutions, the calculated reversal potential for chloride (E<sub>Cl<sup>-</sup></sub>) was -42 mV. Miniature excitatory postsynaptic currents (mEPSCs) were recorded at -70 mV in ACSF in the presence of 1 µM TTX, 20 µM picrotoxin (PiTX), and 5 µM CGP-55845 to isolate synaptic excitatory transmission. Recording pipettes were filled with an internal solution containing (in mM): 130 K<sup>+</sup>-gluconate, 8 KCl, 10 HEPES, 0.2 EGTA, 4 Na<sub>2</sub>ATP,

and 0.3 Na<sub>2</sub>GTP (pH 7.3, 310–330 mOsm). Pipette resistance was 5–7 MΩ. Synaptic currents were filtered at 1 kHz (low pass), digitized (Digidata 1550B, Molecular Devices), and acquired by the pCLAMP software (Molecular Devices) with a PC computer. MiniAnalysis software (SynaptoSoft Inc) and pCLAMP software were used for the analysis of the frequency and amplitude of mIPSCs and mEPSCs.

### ***Cell culture and transfection***

HEK293 and HeLa cells were obtained from the American Type Culture Collection (ATCC) and cultured according to the supplier's recommendations. A plasmid encoding the full-length Nedd4-2 was transiently transfected into HEK293 cells following previously described procedures (11).

### ***Western blot***

The hippocampal formation was isolated from brain slices (350 μm thick) with or without SGK1 inhibitor EMD638683 (50 μM) and transferred to lysis buffer (Tris-Base 0.5 M, pH 7.4; SDS 10 %; phosphatase and proteinase inhibitors). TENT buffer (Tris-EDTA-NaCl-Triton, plus phosphatase and proteinase inhibitors) was used for cultured cells. Total and phosphorylated Nedd4-2 were detected using rabbit antibodies anti-NEDD4L (4013S), anti-p-NEDD4L-S448 (8063S) and anti-p-NEDD4L-S342 (12146S) (Cell Signaling). Total and phosphorylated glycogen synthase kinase 3 (GSK3-β) were detected using rabbit antibodies anti-GSK3-β (9315) and anti-pGSK3α/β-Ser21/9 (9331) (Cell Signaling). Chemiluminescence signals were analyzed using Image Lab software 6.0 (Bio-Rad).

### ***EEG recordings***

Cortical and hippocampal electroencephalogram (EEG) activity was recorded as previously described (44). A nickel-chromium electrode (140 μm) was implanted in the prefrontal cortex (1.5 mm rostral, 1.5 mm lateral and 1 mm ventral to bregma) of 13–15 weeks-old B6.Tg.sgk1 or B6.WT anesthetized mice (1.5% isoflurane in 100% oxygen). A second electrode in the CA1 region of hippocampus (2.4 mm rostral, 1.5 mm lateral, and 1.5 mm ventral to bregma) and two stainless steel screws in the same regions of opposite side for ground and indifferent references were also implanted. Recovering took place in the home cages in a sound attenuated chamber under 12:12 h



light-dark regime, constant temperature (22°C), and *ad libitum* access to food and water. Nine days after surgery, mice were transferred to a circular cage and the implanted cap fixed to a rotating anti-gravitational connector allowing free movement. After a period of habituation of 72 h, 24 h of uninterrupted recording were acquired starting at least 1 h before KA injection. EEG signals of the cortex and hippocampus were filtered (0.5-200 Hz), amplified (x5000-10000), and digitized at 1 kHz (CyberAmp 380, Digidata 1440A, AxoScope 10 software, Molecular Devices). EEG synchronized video recordings (Logitech Software and Cerberus 4.0 Beta) were used to score behavioral Racine's stages.

### ***EEG Data Analysis***

Raw EEG recordings were analyzed using Spike2 V5 software and custom scripts in MATLAB v.5.3 (MathWorks). First, all data were normalized using the z-score to allow for EEG comparisons. EEG segments that contained epileptic activity were determined by time-frequency analysis, which was performed using the Fast Fourier Transform (FFT) to calculate the power spectrum density (0-150 Hz) for 5 s windows (50 % overlapping, Hamming function) with 0.20 Hz resolution. Root-Mean Square (RMS) power of the signals was calculated and smoothed (5-s window) to obtain mean and standard deviation of the normalized amplitude of the cortex and hippocampal signal. Generalized seizures (GS) were defined as episodes of spike discharges of high amplitude ( $\geq 2x$  average baseline amplitude) and high frequency ( $>30$  Hz), and detected automatically. Further analysis rendered values for latency, number and duration of GSs, and inter-seizure interval.

### ***Gene expression analysis***

Quantitative real-time PCR (qPCR) was performed to evaluate relative expression of *Sgk1* isoforms (SGK1 and SGK1.1), KCNQ2, KCNQ3, and KA receptors GRIK 1-5 in B6.Tg.sgk1 and B6.WT mice. RNA extraction was performed from snap-frozen hippocampal and neocortex tissues from mice, using a commercial kit (Real Total RNA spin plus). Quantity and purity of RNA was measured with a Nanodrop 1000 (Thermo Scientific). Equal amounts of total RNA were retrotranscribed to cDNA with iScript cDNA synthesis kit (BioRad). Each qPCR reaction was performed in triplicate using specific primers indicated in **Supplementary Table 1** and iQ SYBR

Green Supermix (Bio-Rad) in a CFX96 Touch™ Real-Time PCR Detection System (Bio-Rad).

Relative quantification of mRNA abundance was performed using Biogazelle qBASE plus-2 software. Data are expressed as average fold-change  $\pm$  SEM.

### ***Statistics***

Statistical analysis was performed using Prism7 (GraphPad) and SigmaPlot (SigmaPlot) as specified in the figure legends. Statistical significance was set at  $p < 0.05$ . Data are presented as mean  $\pm$  SEM.

## **Acknowledgments**

We thank Dr. Teresa Acosta Almeida for help with gene expression data analysis and Dr. Ricardo Gómez for useful comments on the manuscript. This work was funded by grants BFU2015-66490-R, BFU2015-71078-P and BFU2014-58999-P (Ministerio de Economía y Competitividad [MINECO], Spain) to T.G., L.C.B. and J.A.L, respectively. D.A.R., L.C.B., J.A.L. and T.G. are members of the Red de Excelencia “Iniciativa Española en Canales Iónicos” (BFU2015-70067-REDC, MINECO, Spain). T.G. was supported by Programa Ramón y Cajal (RYC-2012-11349, MINECO, Spain). N.A.C. was supported by a predoctoral fellowship from Gobierno de Canarias (Agencia Canaria de Investigación, Innovación y Sociedad de la Información, ACIISI, TESIS20120160). E.M.B. is supported by a F.P.I. predoctoral Fellowship (BES-2016-077337) from MINECO, Spain. The authors declare no competing interests.

## References

1. Brophy GM, Bell R, Claassen J, Alldredge B, Bleck TP, Glauser T, et al. Guidelines for the evaluation and management of status epilepticus. *Neurocrit Care*. 2012;17(1):3-23.
2. Lowenstein DH, Bleck T, and Macdonald RL. It's time to revise the definition of status epilepticus. *Epilepsia*. 1999;40(1):120-2.
3. Engel J, and Pedley TA. *Epilepsy : a comprehensive textbook*. Philadelphia: Wolters Kluwer Health/Lippincott Williams & Wilkins; 2008.
4. Nairismagi J, Grohn OH, Kettunen MI, Nissinen J, Kauppinen RA, and Pitkanen A. Progression of brain damage after status epilepticus and its association with epileptogenesis: a quantitative MRI study in a rat model of temporal lobe epilepsy. *Epilepsia*. 2004;45(9):1024-34.
5. Hesdorffer DC, Logroscino G, Cascino G, Annegers JF, and Hauser WA. Risk of unprovoked seizure after acute symptomatic seizure: effect of status epilepticus. *Ann Neurol*. 1998;44(6):908-12.
6. Novy J, Logroscino G, and Rossetti AO. Refractory status epilepticus: a prospective observational study. *Epilepsia*. 2010;51(2):251-6.
7. Towne AR, Pellock JM, Ko D, and DeLorenzo RJ. Determinants of mortality in status epilepticus. *Epilepsia*. 1994;35(1):27-34.
8. Brown DA, and Adams PR. Muscarinic suppression of a novel voltage-sensitive K<sup>+</sup> current in a vertebrate neurone. *Nature*. 1980;283(5748):673-6.
9. Brown DA, and Passmore GM. Neural KCNQ (Kv7) channels. *Br J Pharmacol*. 2009;156(8):1185-95.
10. Wang HS, Pan Z, Shi W, Brown BS, Wymore RS, Cohen IS, et al. KCNQ2 and KCNQ3 potassium channel subunits: molecular correlates of the M-channel. *Science*. 1998;282(5395):1890-3.
11. Miranda P, Cadaveira-Mosquera A, Gonzalez-Montelongo R, Villarreal A, Gonzalez-Hernandez T, Lamas JA, et al. The neuronal serum- and glucocorticoid-regulated kinase 1.1 reduces neuronal excitability and protects against seizures through upregulation of the M-current. *J Neurosci*. 2013;33(6):2684-96.
12. Arteaga MF, Coric T, Straub C, and Canessa CM. A brain-specific SGK1 splice isoform regulates expression of ASIC1 in neurons. *Proc Natl Acad Sci U S A*. 2008;105(11):4459-64.
13. Wesch D, Miranda P, Afonso-Oramas D, Althaus M, Castro-Hernandez J, Dominguez J, et al. The neuronal-specific SGK1.1 kinase regulates {delta}-epithelial Na<sup>+</sup> channel independently of PY motifs and couples it to phospholipase C signaling. *Am J Physiol Cell Physiol*. 2010;299(4):C779-90.
14. Delmas P, and Brown DA. Pathways modulating neural KCNQ/M (Kv7) potassium channels. *Nat Rev Neurosci*. 2005;6(11):850-62.
15. McLin JP, and Steward O. Comparison of seizure phenotype and neurodegeneration induced by systemic kainic acid in inbred, outbred, and hybrid mouse strains. *Eur J Neurosci*. 2006;24(8):2191-202.
16. Gimenez-Cassina A, Martinez-Francois JR, Fisher JK, Szlyk B, Polak K, Wiwezar J, et al. BAD-dependent regulation of fuel metabolism and K(ATP) channel activity confers resistance to epileptic seizures. *Neuron*. 2012;74(4):719-30.
17. Curia G, Longo D, Biagini G, Jones RS, and Avoli M. The pilocarpine model of temporal lobe epilepsy. *J Neurosci Methods*. 2008;172(2):143-57.
18. McCord MC, Lorenzana A, Bloom CS, Chancer ZO, and Schauwecker PE. Effect of age on kainate-induced seizure severity and cell death. *Neuroscience*. 2008;154(3):1143-53.
19. McKhann GM, 2nd, Wenzel HJ, Robbins CA, Sosunov AA, and Schwartzkroin PA. Mouse strain differences in kainic acid sensitivity, seizure behavior, mortality, and hippocampal pathology. *Neuroscience*. 2003;122(2):551-61.

20. Medina AE, Manhaes AC, and Schmidt SL. Sex differences in sensitivity to seizures elicited by pentylenetetrazol in mice. *Pharmacol Biochem Behav.* 2001;68(3):591-6.
21. Mejias-Aponte CA, Jimenez-Rivera CA, and Segarra AC. Sex differences in models of temporal lobe epilepsy: role of testosterone. *Brain Res.* 2002;944(1-2):210-8.
22. Schauwecker PE, and Steward O. Genetic determinants of susceptibility to excitotoxic cell death: implications for gene targeting approaches. *Proc Natl Acad Sci U S A.* 1997;94(8):4103-8.
23. Levesque M, and Avoli M. The kainic acid model of temporal lobe epilepsy. *Neurosci Biobehav Rev.* 2013;37(10 Pt 2):2887-99.
24. Debonneville C, Flores SY, Kamynina E, Plant PJ, Tauxe C, Thomas MA, et al. Phosphorylation of Nedd4-2 by Sgk1 regulates epithelial Na<sup>(+)</sup> channel cell surface expression. *EMBO J.* 2001;20(24):7052-9.
25. Snyder PM, Olson DR, and Thomas BC. Serum and glucocorticoid-regulated kinase modulates Nedd4-2-mediated inhibition of the epithelial Na<sup>+</sup> channel. *J Biol Chem.* 2002;277(1):5-8.
26. Kobayashi T, and Cohen P. Activation of serum- and glucocorticoid-regulated protein kinase by agonists that activate phosphatidylinositide 3-kinase is mediated by 3-phosphoinositide-dependent protein kinase-1 (PDK1) and PDK2. *Biochem J.* 1999;339 ( Pt 2):319-28.
27. Ben-Ari Y, Tremblay E, Riche D, Ghilini G, and Naquet R. Electrographic, clinical and pathological alterations following systemic administration of kainic acid, bicuculline or pentetrazole: metabolic mapping using the deoxyglucose method with special reference to the pathology of epilepsy. *Neuroscience.* 1981;6(7):1361-91.
28. Peters HC, Hu H, Pongs O, Storm JF, and Isbrandt D. Conditional transgenic suppression of M channels in mouse brain reveals functions in neuronal excitability, resonance and behavior. *Nat Neurosci.* 2005;8(1):51-60.
29. Greene DL, and Hoshi N. Modulation of Kv7 channels and excitability in the brain. *Cell Mol Life Sci.* 2017;74(3):495-508.
30. Gu N, Vervaeke K, Hu H, and Storm JF. Kv7/KCNQ/M and HCN/h, but not KCa2/SK channels, contribute to the somatic medium after-hyperpolarization and excitability control in CA1 hippocampal pyramidal cells. *J Physiol.* 2005;566(Pt 3):689-715.
31. Cherubini E, Rovira C, Gho M, and Ben-Ari Y. Effects of kainate on CA1 hippocampal neurons recorded in vitro. *Adv Exp Med Biol.* 1986;203:475-84.
32. Madison DV, and Nicoll RA. Control of the repetitive discharge of rat CA 1 pyramidal neurones in vitro. *J Physiol.* 1984;354:319-31.
33. Aiken SP, Lampe BJ, Murphy PA, and Brown BS. Reduction of spike frequency adaptation and blockade of M-current in rat CA1 pyramidal neurones by linopirdine (DuP 996), a neurotransmitter release enhancer. *Br J Pharmacol.* 1995;115(7):1163-8.
34. Lamas JA, Selyanko AA, and Brown DA. Effects of a cognition-enhancer, linopirdine (DuP 996), on M-type potassium currents (IK(M)) and some other voltage- and ligand-gated membrane currents in rat sympathetic neurons. *Eur J Neurosci.* 1997;9(3):605-16.
35. Lawrence JJ, Saraga F, Churchill JF, Statland JM, Travis KE, Skinner FK, et al. Somatodendritic Kv7/KCNQ/M channels control interspike interval in hippocampal interneurons. *J Neurosci.* 2006;26(47):12325-38.
36. Ben-Ari Y, and Cossart R. Kainate, a double agent that generates seizures: two decades of progress. *Trends Neurosci.* 2000;23(11):580-7.
37. Ihara Y, Tomonoh Y, Deshimaru M, Zhang B, Uchida T, Ishii A, et al. Retigabine, a Kv7.2/Kv7.3-Channel Opener, Attenuates Drug-Induced Seizures in Knock-In Mice Harboring Kcnq2 Mutations. *PLoS One.* 2016;11(2):e0150095.
38. Boggs JG. Mortality Associated with Status Epilepticus. *Epilepsy Curr.* 2004;4(1):25-7.
39. DeLorenzo RJ, Garnett LK, Towne AR, Waterhouse EJ, Boggs JG, Morton L, et al. Comparison of status epilepticus with prolonged seizure episodes lasting from 10 to 29 minutes. *Epilepsia.* 1999;40(2):164-9.

40. Xie C, Sun J, Qiao W, Lu D, Wei L, Na M, et al. Administration of simvastatin after kainic acid-induced status epilepticus restrains chronic temporal lobe epilepsy. *PLoS One*. 2011;6(9):e24966.
41. Phelan KD, Shwe UT, Williams DK, Greenfield LJ, and Zheng F. Pilocarpine-induced status epilepticus in mice: A comparison of spectral analysis of electroencephalogram and behavioral grading using the Racine scale. *Epilepsy Res*. 2015;117:90-6.
42. Song MK, Cui YY, Zhang WW, Zhu L, Lu Y, and Chen HZ. The facilitating effect of systemic administration of Kv7/M channel blocker XE991 on LTP induction in the hippocampal CA1 area independent of muscarinic activation. *Neurosci Lett*. 2009;461(1):25-9.
43. Racine RJ. Modification of seizure activity by electrical stimulation. II. Motor seizure. *Electroencephalogr Clin Neurophysiol*. 1972;32(3):281-94.
44. Perez-Atencio L, Garcia-Aracil N, Fernandez E, Barrio LC, and Barios JA. A four-state Markov model of sleep-wakefulness dynamics along light/dark cycle in mice. *PLoS One*. 2018;13(1):e0189931.

## Figures and Figure legends

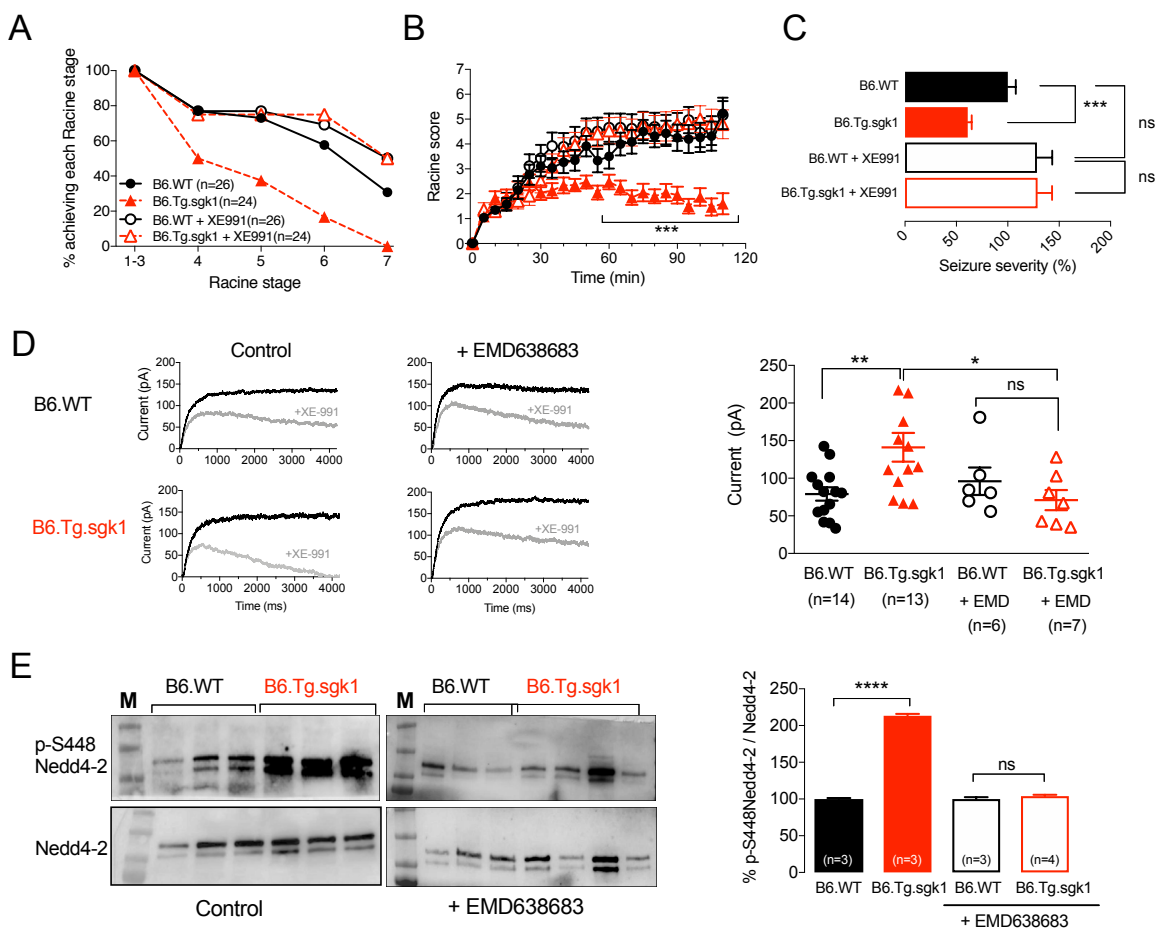

**Figure 1. B6.Tg.sgk1 mice show reduced seizure severity after systemic KA administration via M-current activation.** (A) Cumulative plot representing the percentage of mice reaching the indicated Racine stages. Number of experiments for each condition is indicated in the legend. (B) Raw Racine stage score (mean  $\pm$  SEM) in 5 min intervals over the monitored period of time. Symbols and number of experiments are the same as in legend of panel A. \*\*\*  $p < 0.002$ , two-tailed Student *t*-test. (C) KA-induced seizure severity values for both mice genotypes, with and without previous treatment with XE991. Values are mean  $\pm$  SEM. \*\*\*  $p < 0.0005$ , ns not significant, two-way ANOVA. (D) Left, Representative current traces in response to a depolarizing pulse from -70 mV to -30 mV before (black) and after addition of 3  $\mu$ M XE991 (gray), in the absence and presence of 50  $\mu$ M EMD638683. Right, M-current values for each group of neurons without and with pre-incubation with EMD638683. \*  $p < 0.05$ ; \*\*  $p < 0.01$ , n.s. non-significant, two-way ANOVA. (E) Left, Representative immunoblots for detection of total Nedd4-2 (lower panels) and its phosphorylated form (P-S448; upper panels) in hippocampus lysates from B6.WT and B6.Tg.sgk1, without and with pre-treatment with EMD638683. Right, Quantification of P-S448-Nedd4-2 (relative to total Nedd4-2). \*\*\*\*  $p < 0.0001$ , ns not significant, Unpaired Student-test.

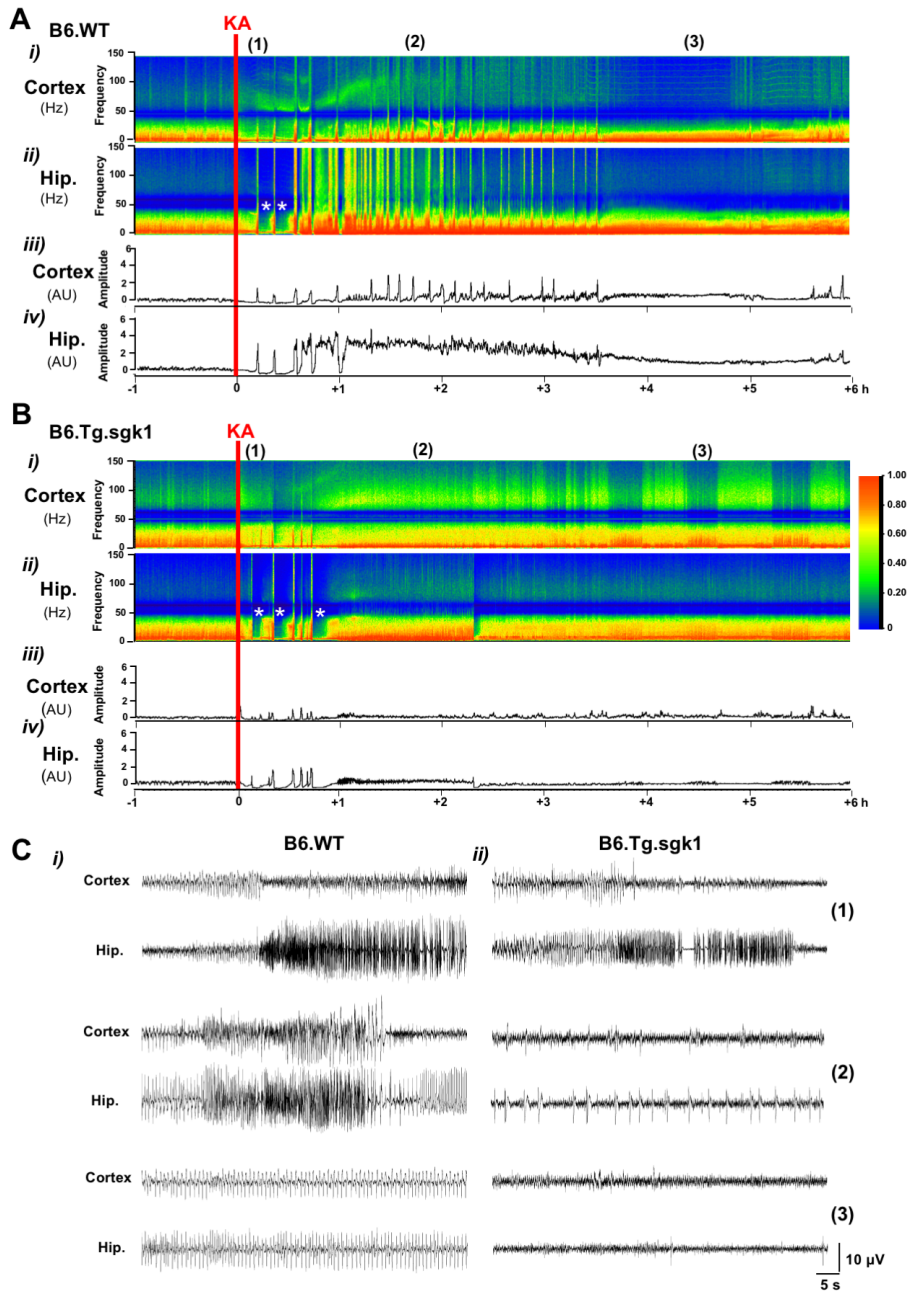

**Figure 2. EEG recordings show reduced severity of KA-induced seizures in B6.Tg.sgk1 mice.** Time-frequency plots of cortex and hippocampus signals (*i* and *ii*) and the corresponding normalized values of amplitude (*iii* and *iv*) 1 h prior to and 6 h after KA injection (red line) in (A) B6.WT and (B) B6.Tg.sgk1 mice. (C) Insets of raw EEG traces at time points (1) to (3) indicated on top of panels A and B. WT mice responded initially (0-30 min) with seizure activity of increasing amplitude and power of multiple frequencies reaching the first generalized seizures (GS; A-1 and C-i-1) followed by postictal depression (\*). SE worsened over the course of 1<sup>st</sup>-2<sup>nd</sup> hour with increasing number of GS and interictal spiking activity (A-2 and C-i-2), after which GS rate decreased progressively. An intensive spiking activity still remained within the 6<sup>th</sup> hour of recording (A-3 and C-i-3). B6.Tg.sgk1 mice exhibited a significant lower SE severity with fewer GS and less interictal activity, and a complete recovery of normal EEG activity (B, 1-3 and C-ii, 1-3).



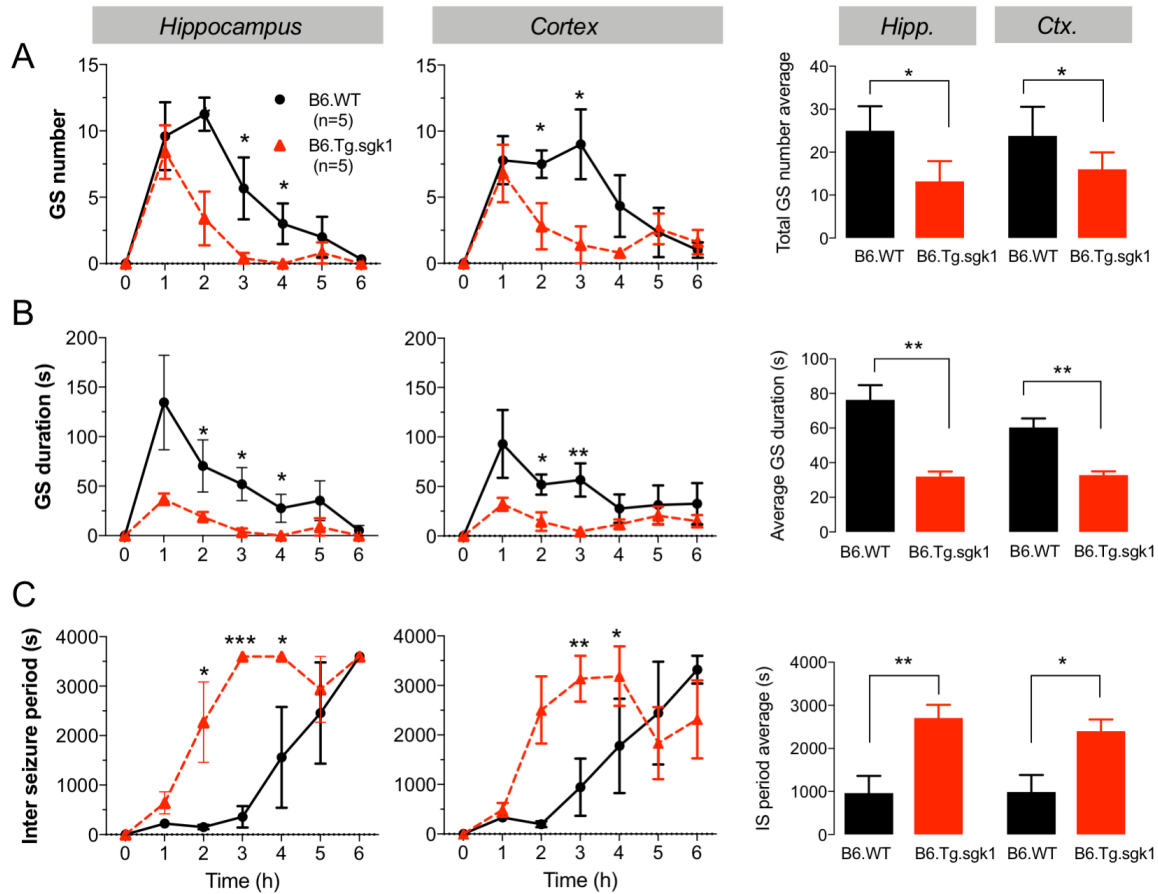

**Figure 3. Activation of SGK1.1 reduces generalized seizure (GS) number and duration in hippocampus and cortex.** (A) Time course of average number of GS after KA administration in hippocampus (*left*) and cortex (*middle*) and average GS number during the duration of the experiment (6 h) (*right*). Data are presented as mean  $\pm$  SEM corresponding to 1 h intervals; \*  $p < 0.05$ , two-tailed Student *t*-test. (B) Time course of GS duration after KA administration in hippocampus (*left*) and cortex (*middle*), and average GS duration corresponding to the duration of the experiment (*right*). Data are presented as mean  $\pm$  SEM corresponding to 1 h intervals; \*  $p < 0.05$ , \*\*  $p < 0.01$ , two-tailed Student *t*-test. (C) Time course of inter-seizure periods after KA administration in hippocampus (*left*) and cortex (*middle*) and average inter-seizure period during the experiment (6 h) (*right*). Data are presented as mean  $\pm$  SEM corresponding to 1 h intervals; \*  $p < 0.05$ , \*\*  $p < 0.01$ , \*\*\*  $p < 0.001$ , two-tailed Student *t*-test.

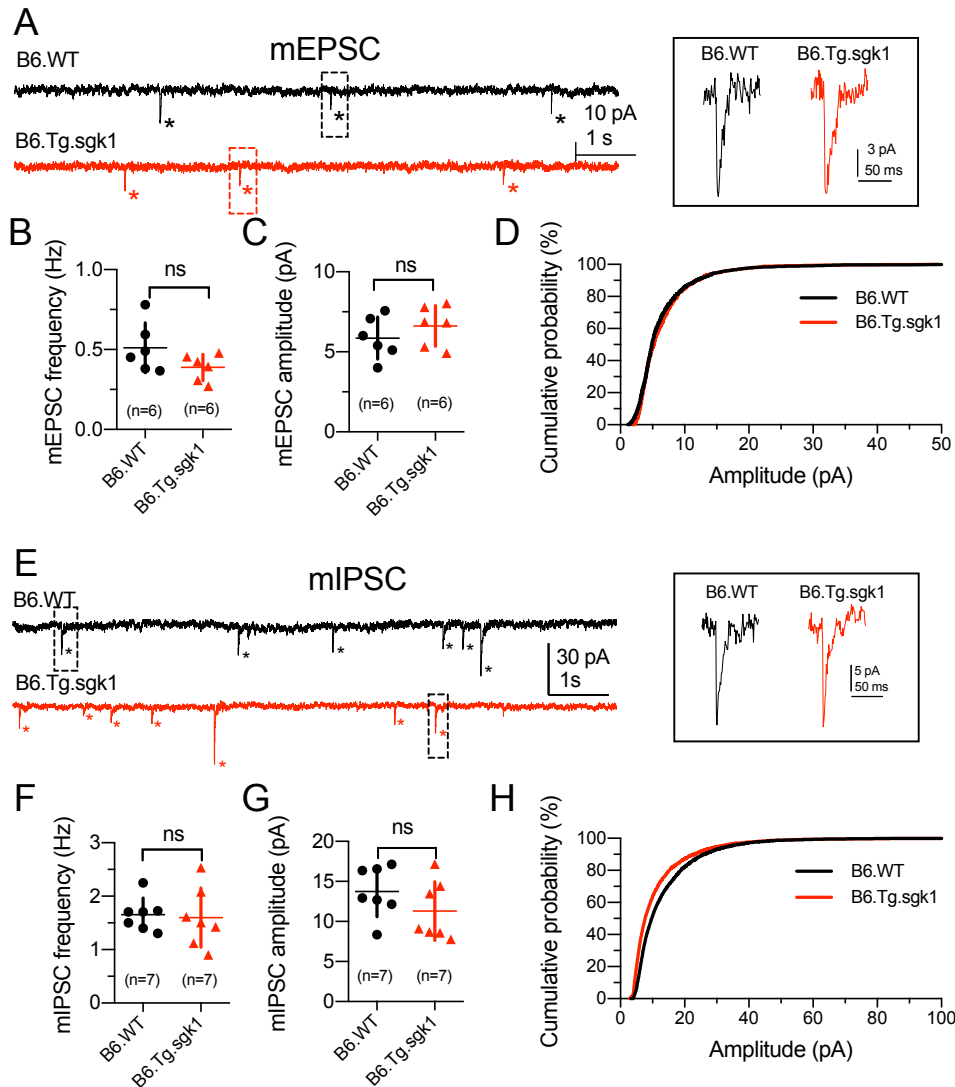

**Figure 4. Basal synaptic transmission is not altered in B6.Tg.sgk1 mice.** (A) Representative current traces recorded at  $-70$  mV in CA1-PN from B6.WT (black) and B6.Tg.sgk1 (red) mice in the presence of  $1 \mu\text{M}$  TTX,  $50 \mu\text{M}$  PiTX, and  $5 \mu\text{M}$  CPG-55845 to isolate mEPSCs. Asterisks denote mEPSC events. Insert shows representative mEPSCs in an expanded scale. (B) Frequency, (C) amplitude, and (D) cumulative probability distribution of amplitudes of mEPSC in B6.WT (black) and B6.Tg.sgk1 mice (red). (E) Representative current traces recorded at  $-70$  mV in CA1-PN from B6.WT (black) and B6.Tg.sgk1 (red) mice in the presence of  $1 \mu\text{M}$  TTX,  $50 \mu\text{M}$  AP5, and  $20 \mu\text{M}$  CNQX to isolate mIPSCs. Asterisks denote mIPSC events. Insert shows representative mIPSCs in an expanded scale. (F) Frequency, (G) amplitude, and (H) cumulative probability distribution of amplitudes of mIPSC in B6.WT (black) and B6.Tg.sgk1 mice (red). *ns*, not significant, unpaired two-tailed *t*-test.

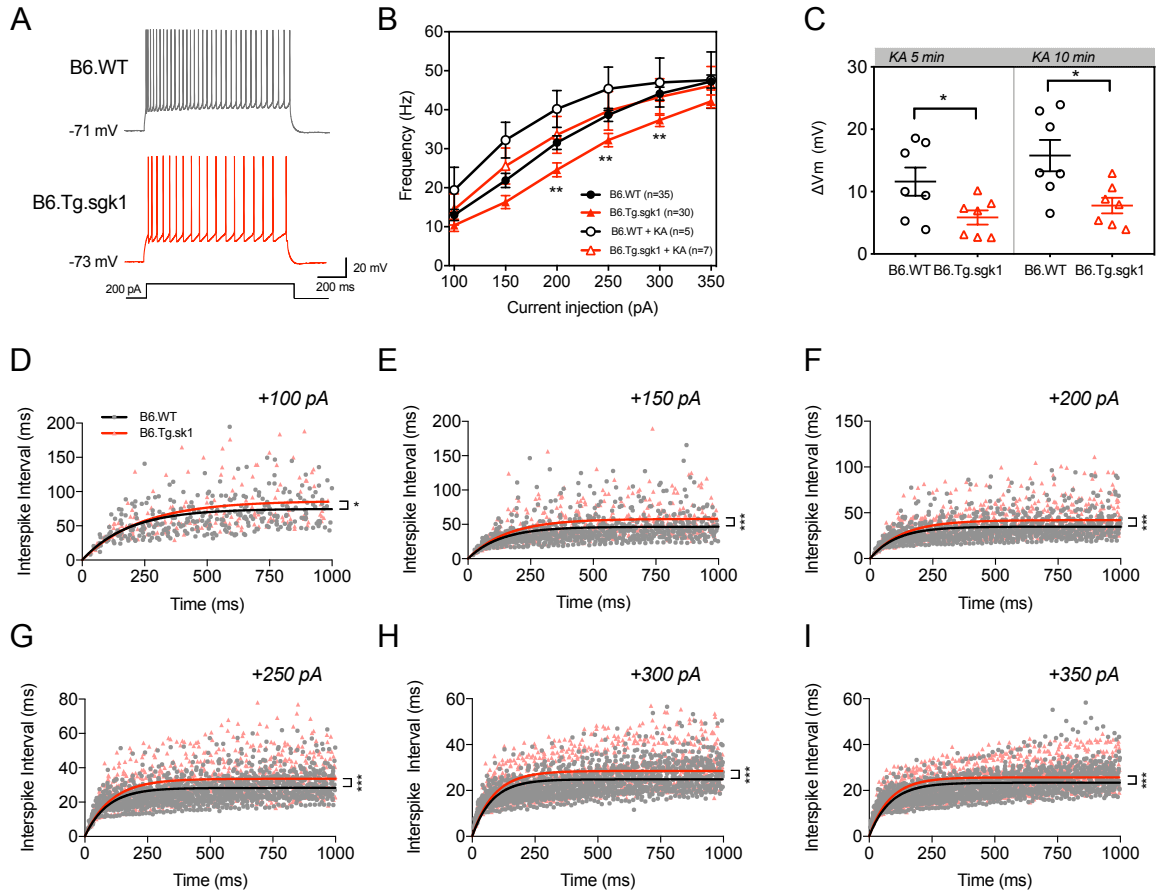

**Figure 5. Intrinsic excitability is reduced in CA1-PN from B6.Tg.sgk1 mice.** (A) *Left*, representative traces recorded in CA1-PN after a 200 pA current injection in B6.WT (black) and B6.Tg.sgk1 (red) mice. (B) Frequency-current relationships for CA1-PN from B6.WT (black) and B6.Tg.sgk1 (red) mice in the absence (full symbols) and the presence (open symbols) of KA; \*\*  $p < 0.01$ , *Multiple t-test*. (C) Resting membrane potential increments 5 min (left) and 10 min (right) after KA application in CA1-PN from B6.WT (black) and B6.Tg.sgk1 (red) mice; \*  $p < 0.05$ , *unpaired Student t-test*. (D-I) CA1-PN interspike intervals vs time after current injections indicated on top of graphs, from B6.WT (black) and B6.Tg.sgk1 (red) mice. Solid lines correspond to exponential function fit to the data; \*  $p < 0.05$ , \*\*\*  $p < 0.001$ , *F-test*.

## SUPPLEMENTAL DATA

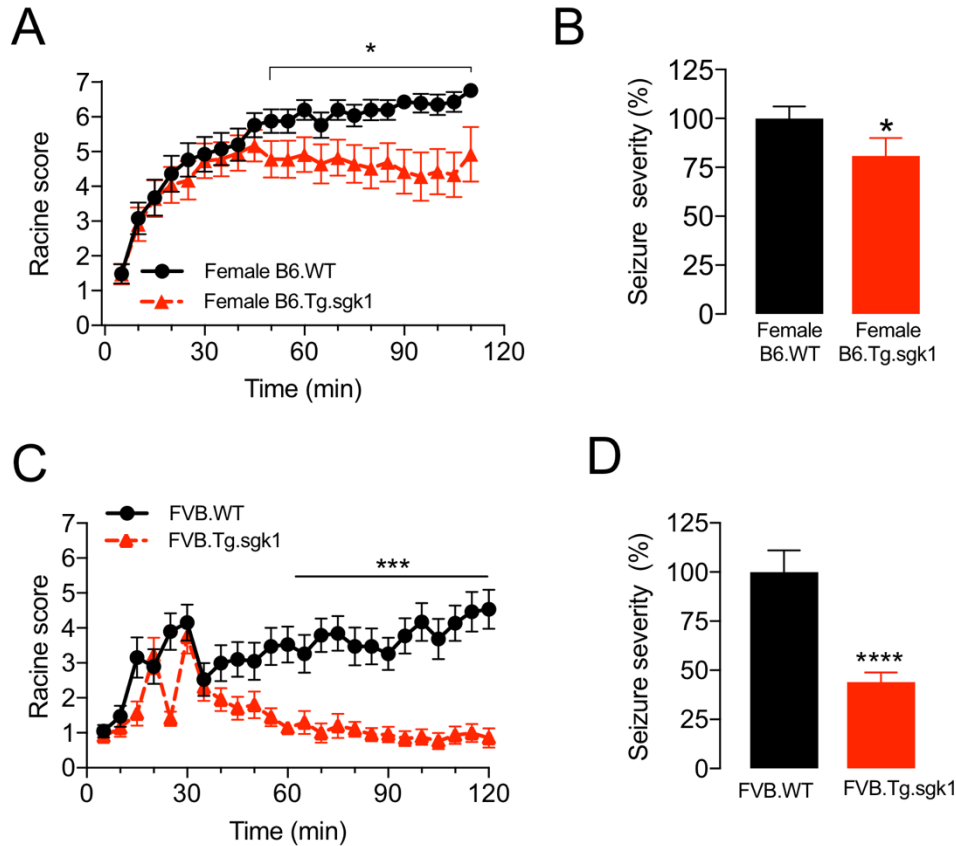

**Supplemental Figure 1. Seizure protection associated to *Sgk1* activation is independent of sex and genetic background.** (A) Averaged Racine score measured at 5 min-intervals for female mice of both genotypes. Data are mean  $\pm$  SEM; \*  $p < 0.05$ , \*\*  $p < 0.005$ , *two-tailed Student t-test*. The evolution of seizure-like behavior in female mice, including the differences between genotypes, was similar to that observed in males. Of note, our results showed a significantly higher percentage of female animals experiencing severe seizures as compared to their male counterparts for both B6.WT and B6.Tg.sgk1 genotypes (61% B6.Tg.sgk1 females reaching tonic-clonic seizures vs. 92% B6.WT), in agreement with previous findings indicating higher susceptibility of females to seizures ((20) but see also (21)). (B) Integrated seizure severity corresponding to female mice, represented as mean  $\pm$  SEM; \*  $p < 0.5$ , *Two-tail, Student t-test*. (C) Time-course analysis of the Racine score for 5 min intervals in Tg.sgk1 mice backcrossed into a FVB/NJ background, which has been proposed to be more susceptible to KA-induced seizures (45); \*\*\*  $p < 0.0005$ , *two-tailed Student t-test*. (D) Integrated seizure severity of FVB.Tg.sgk1 mice compared to FVB.WT. Note that transgenic mice showed a regression towards less severe stages after the initial period of seizure progression, while FVB.WT mice continued progressing towards tonic-clonic seizures levels over at least 1h. Data are mean  $\pm$  SEM; \*\*\*\*  $p = 0.0001$ , *two-tailed Student t-test*.

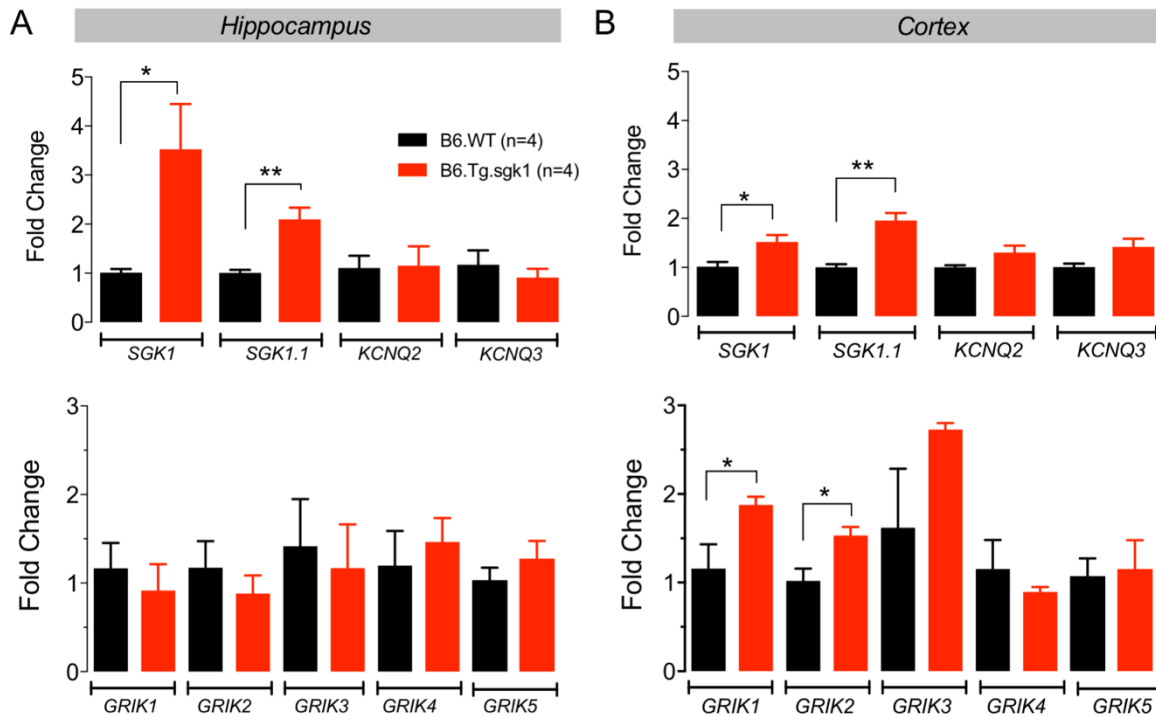

**Supplemental Figure 2.** Analysis of mRNA expression of SGK1, SGK1.1, KCNQ2 and KCNQ3 (*top graphs*), KA receptors GRIK1 (GluR5), GRIK2 (GluR6), GRIK3 (GluR7), GRIK4 (KA1) and GRIK5 (KA2) (*Bottom graphs*) in (A) hippocampus and (B) cortex. Note that basal expression levels of SGK1 and SGK1.1 were significantly increased in B6.Tg.sgk1 hippocampus and cortex. No variations in KCNQ2/3 gene expression were observed between genotypes. No significant alterations in GRIK1-5 KA receptor expression were observed in hippocampus, although slightly increased expression of GRIK1 and GRIK2 was noticed in the cortex of transgenic animals. Data were normalized using the relative expression of two housekeeper genes (RPL13a and CycA). Bars represent fold change  $\pm$  SEM in reference to B6.WT. \*  $p < 0.05$ , \*\*  $p < 0.005$ , two-tailed Student *t*-test.

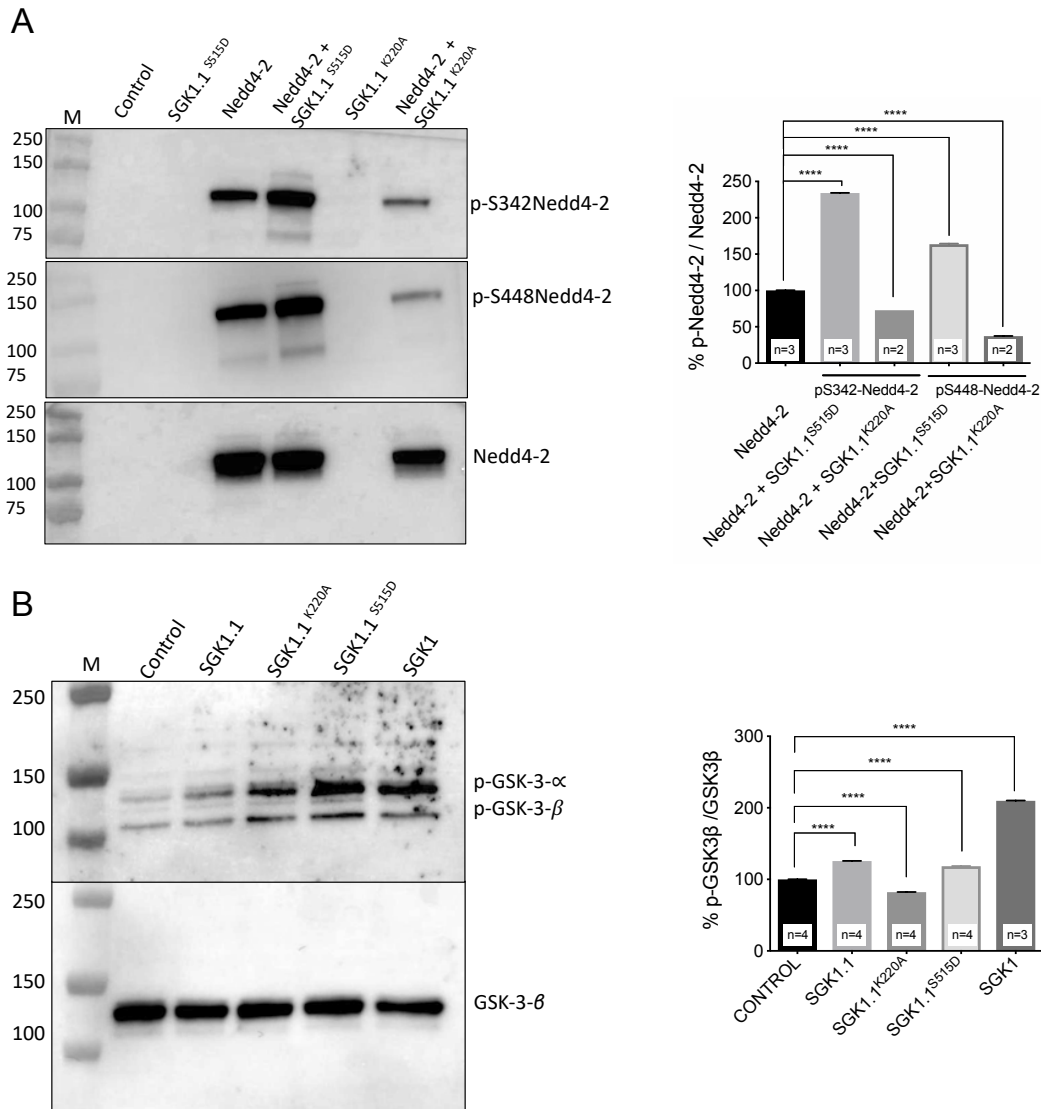

**Supplemental Figure 3. SGK1.1 phosphorylates Nedd4-2 and GSK3-β in heterologous expression systems.** (A) *Left*, representative immunoblot of protein extracts from HEK293 cells transiently co-transfected with the indicated combinations of Nedd4-2, SGK1.1<sup>S515D</sup> (constitutively active SGK1.1 mutant) and SGK1.1<sup>K220A</sup> (kinase inactive mutant). Top panel, labeling with pS342-Nedd4-2 antibody. Middle panel, pS448-Nedd4-2. Total Nedd4-2 was used as internal standard. Untransfected cells were used as negative control. M, molecular mass markers (in kDa). *Right*: Quantification of pS342-Nedd4-2 and pS448-Nedd4-2 levels relative to levels of total Nedd4-2. Bars are mean ± SEM; \*\*\*\*p<0,0001, one-way ANOVA, Dunnett's multiple comparisons test. (B) *Left*: Representative immunoblot of HeLa cells transfected with the indicated plasmid combinations and probed with an antibody against pS21-GSK3-α and pS9-GSK3-β. Total GSK3-β was used as internal standard. Untransfected cells were used as negative control. *Right*: Quantification of pS9-GSK3-β levels relative to total GSK3-β. Bars represent mean ± SEM; \*\*\*\*p<0,0001, one-way ANOVA, Dunnett's multiple comparisons test.

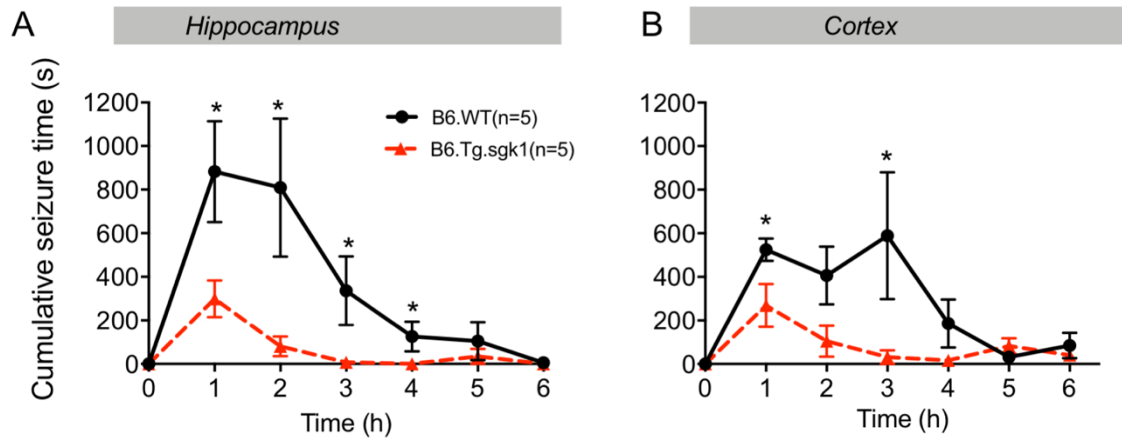

**Supplemental Figure 4. Activation of SGK1.1 reduces cumulative seizure time.** Graphs represent the cumulative seizure time during the EEG experiments in **(A)** hippocampus and **(B)** cortex. Data are mean  $\pm$  SEM; \* $p < 0.05$ , two-tailed Student *t*-test.

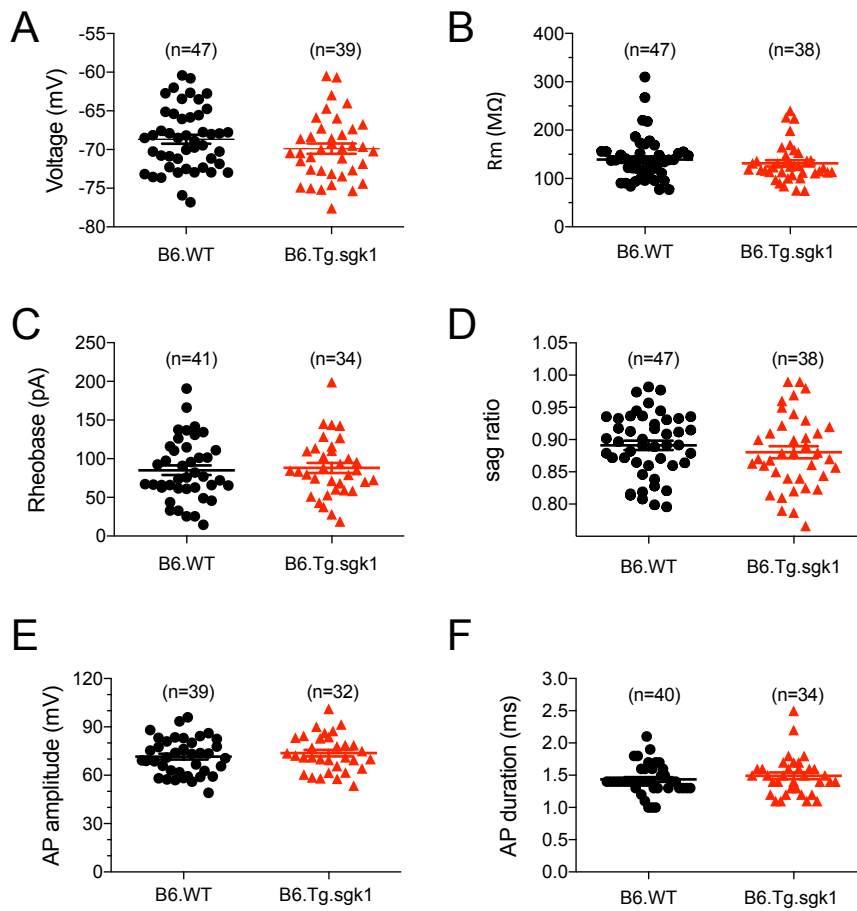

**Supplemental Figure 5. Membrane properties and action potential characteristics of B6.WT and B6.Tg.sgk1 CA1-PN.** (A) resting membrane potential, (B) membrane resistance, (C) rheobase, (D) sag ratio, (E) action potential amplitude, and (F) action potential duration. No significant statistical differences were observed between genotypes for any of these parameters (*two-tailed Student t-tests*).



## Supplementary Tables

**Supplementary Table 1. Primers pairs used for qPCR analysis of mRNA expression.**

| Gene                | Forward 5-3'              | Reverse 5-3'              |
|---------------------|---------------------------|---------------------------|
| <b>Housekeepers</b> |                           |                           |
| Rpl13a              | GGATCCCTCCACCCTATGACA     | CTGGTACTTCCACCCGACCTC     |
| CycA                | TATCTGCACTGCCAAGACTGAGTG  | CTTCTTGCTGGTCTTGCCATTCC   |
| TBP                 | CTCAGTTACAGGTGGCAGCA      | CAGCACAGAGCAAGCAACTC      |
| <b>Target mRNAs</b> |                           |                           |
| Sgk1                | CGGTTTCACTGCTCCCCTCAG     | GCGATGAGAATCGCTACCATT     |
| Sgk1.1              | GAAGGCGGATCGGGATACAGATGC  | GGGCTCTTGATCCATCTTCGT     |
| KCNQ2               | CGGGGCCCAACAATAACGGA      | CACCTTCCCAAGCCGYCCCA      |
| KCNQ3               | TCGCCTTTCTAATCCTCGTGGTAGC | AGGCTTTGGCTCTTTGGAAGGG    |
| GluK1 (GRIK1)       | GACTCGTCCTTTCTGTGTTTGTAGC | GTGAGATTCCCAGCTCTTCCATGAT |
| GluK2 (GRIK2)       | GTCTCTGAAGTGCCAGCGTCG     | ATTGGCCTCCCAGCTTCATGC     |
| GluK3 (GRIK3)       | CTCTGCTGCCAACACGACC       | TGCGATGGCCCAAAGATGGC      |
| GluK4 (GRIK4)       | TCCGCTTGTTGGGGATGGT       | GCCAGATCCGCTTCCGAGC       |
| GluK5 (GRIK5)       | GCTGCTGCGCTCCGATACC       | GGTCTGCCTTCCGGTTGATGAG    |

Rpl13a: Ribosomal protein L13A; CycA: Cyclophilin A; TBP: TATA binding protein; GluR: Glutamate receptor; GRIK: Glutamate ionotropic receptor kainate type
